# Supplementary material for: Apple Consumption Protects against Acute Ethanol-Induced Liver Injury in Rats
Source: MDPI journal article supplement (doi:10.3390/app13085112), 2023-04-20
Supplement: s1 [file s1]

**Table S1.** Primer sequences for real-time quantitative PCR.

| Gene                           | Gene ID        | FORWARD                   | REVERSE                   |
|--------------------------------|----------------|---------------------------|---------------------------|
| <i>Actb</i>                    | NM_031144.3    | GGTCAGGTCATCACTATCGGCAATG | CAGCACTGTGTTGGCATAGAGGTC  |
| <i>Adh1</i>                    | NM_019286.4    | TGTTGGTCTGTCTGTCGTCATTGG  | CCTGGATGGGTTTGGTGTAGTCTTG |
| <i>Aldh2</i>                   | NM_022407.3    | CCTCCTGGCGTGGTGAACATTG    | CAGCGTGACCCTCTTCAGATTGC   |
| <i>Cyp2e1</i>                  | NM_031543.2    | CAATCTTGTCCTTCCAACCTACCC  | CTGGATCTGGAAACTCATGGCTGTC |
| <i>Cat</i>                     | NM_012520.2    | AGAAACCCACAACTCACCTGAAGG  | GAATCCCTCGGTCGCTGAACAAG   |
| <i>Nrf2</i>                    | NM_001399226.1 | TGCCACCGCCAGGACTACAG      | GCGTGCTCAGAAACCTCCTTCC    |
| <i>Ho-1</i>                    | NM_012580.2    | CAGGTGTCCAGGGAAGGCTTTAAG  | TGGGTTCTGCTTGTTCGCTCTATC  |
| <i>IL-1<math>\beta</math></i>  | NM_031512.2    | AATCTCACAGCAGCATCTCGACAAG | TCCACGGGCAAGACATAGGTAGC   |
| <i>TNF-<math>\alpha</math></i> | NM_012675.3    | ATGGGCTCCCTCTCATCAGTTCC   | CCTCCGCTTGGTGGTTTGCTAC    |
| <i>IL-10</i>                   | NM_012854.2    | GGCAGTGGAGCAGGTGAAGAATG   | TGTCACGTAGGCTTCTATGCAGTTG |
| <i>Fabp2</i>                   | NM_013068.1    | TGAAACTGACGATCACACAGGAAGG | GACGCCGAGTTCAAACACAACATC  |
| <i>Acac</i>                    | NM_022193.1    | CGTTCGCCATAACCAAGTAGAGTCC | ATATACCTCCAGAGCCGCCATCC   |
| <i>Cpt1a</i>                   | NM_031559.2    | CAGGAGAGTGCCAGGAGGTCATAG  | TGCCGAAAGAGTCAAATGGGAAGG  |
| <i>Colla1</i>                  | NM_053304.1    | TGTTGGTCCTGCTGGCAAGAATG   | GTCACCTTGTTTCGCCTGTCTCAC  |
| <i>Acta2</i>                   | NM_031004.2    | TAGAACACGGCATCATCACCAACTG | ACATACATGGCAGGGACATTGAAGG |

**Table S2.** Primer sequences for real-time semi-quantitative PCR.

| Gene                           | Gene ID        | FORWARD                   | REVERSE                    | ProdSize |
|--------------------------------|----------------|---------------------------|----------------------------|----------|
| <i>Actb</i>                    | NM_031144.3    | GGTCAGGTCATCACTATCGGCAATG | CAGCACTGTGTTGGCATAGAGGTC   | 165      |
| <i>Adh1</i>                    | NM_019286.4    | CTTCATCAGCACCAGCACCTTCTC  | CAGCCAATGACGACAGACAGACC    | 216      |
| <i>Aldh2</i>                   | NM_022407.3    | GTTTCCTCCTGGCGTGGTGAAC    | AGCAATGTCCAAGTCGGCATCTG    | 223      |
| <i>Cyp2e1</i>                  | NM_031543.2    | GGAAGTGAAGACCAGCACAAC     | GGGTAGGTTGGAAGGGACAAGATTG  | 210      |
| <i>Cat</i>                     | NM_012520.2    | CCAGCGACCAGATGAAGCAGTG    | CTGTGGAGAATCGGACGGCAATAG   | 324      |
| <i>Nrf2</i>                    | NM_001399226.1 | ACGAGGCGGTACAAGTTTTGGAAG  | AGGGACTGGAGAGATGGCTAAACC   | 385      |
| <i>Ho-1</i>                    | NM_012580.2    | GGAAGTTTCAGAAGGGTCAGGTGTC | GCTGTGTGGCTGGTGTGTAAGG     | 234      |
| <i>IL-1<math>\beta</math></i>  | NM_031512.2    | CGACCTGCTAGTGTGTGATGTTCC  | GGTGGGTGTGCCGTCTTTCATC     | 256      |
| <i>TNF-<math>\alpha</math></i> | NM_012675.3    | CACCACGCTCTTCTGTCTACTGAAC | GGTATGAAATGGCAAATCGGCTGAC  | 365      |
| <i>IL-10</i>                   | NM_012854.2    | TGACAATAACTGCACCCACTTCCC  | CTTCACCTGCTCCACTGCCTTG     | 352      |
| <i>Fabp2</i>                   | NM_013068.1    | TGAAAGTGAAGATCACACAGGAAGG | ACCAGAAATCTCTCGGACAGCAATC  | 224      |
| <i>Acac</i>                    | NM_022193.1    | ACAACGCCTTCACACCACCTTG    | GCCTGTCATCCTCAATATCGCCATC  | 243      |
| <i>Cpt1a</i>                   | NM_031559.2    | TGGCTATGGTCAAGGTCTCTCAG   | CAGCAGTATGGCGTGGATGGTG     | 392      |
| <i>Colla1</i>                  | NM_053304.1    | TCACCAGACGCAGAAGTCATAGGAG | GGAGACCACGAGGACCAGAAGG     | 262      |
| <i>Acta2</i>                   | NM_031004.2    | TAGAACACGGCATCATCACCAACTG | CATCTCCAGAGTCCAGCACAAATACC | 261      |
